# Supplementary material for: The climate impact of hydrogen-powered hypersonic transport
Source: Copernicus journal article supplement (doi:10.5194/acp-22-14323-2022), 2022-11-08
Supplement: Supplementary file 1 [file acp-22-14323-2022-supplement.zip]

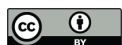

## *Supplement of*

# **The climate impact of hydrogen-powered hypersonic transport**

**Johannes Pletzer et al.**

*Correspondence to:* Johannes Pletzer ([johannes.pletzer@dlr.de](mailto:johannes.pletzer@dlr.de))

- [acp-22-14323-2022-supplement-title-page.pdf](#)
- [meccanism.pdf](#)
- [scavinism.pdf](#)

The copyright of individual parts of the supplement might differ from the article licence.
