# Supplementary material for: The climate impact of hydrogen-powered hypersonic transport
Source: Copernicus journal article supplement (doi:10.5194/acp-22-14323-2022), 2022-11-08
Supplement: Supplementary file 4 [file acp-22-14323-2022-supplement.zip]

Archive with 3 entries (3 files):
- scavinism.pdf
- meccanism.pdf
- acp-22-14323-2022-supplement-title-page.pdf
